# Supplementary material for: Infiltration of CD4+ lymphocytes into the brain contributes to neurodegeneration in a mouse model of Parkinson disease
Source: JCI journal article supplement (doi:10.1172/jci36470), 2008-12-18
Supplement: sd1 [file 1]

## Supplemental Table 1

Antibodies used for the detection of leukocyte subsets in the human brain

---

| Antigen       | Cellular expression                                      | Function                                 |
|---------------|----------------------------------------------------------|------------------------------------------|
| CD8           | Thymocyte subsets,<br>cytotoxic T-cells                  | co-receptor for MHC class I              |
| CD4           | Thymocyte subsets,<br>helper and<br>inflammatory T-cells | co-receptor for MHC class II             |
| CD79 $\alpha$ | B-cells                                                  | component of the B-cell receptor complex |
| CD20          | B-cells                                                  | putative calcium channel                 |
| CD57          | natural killer cell                                      | human lymphocyte oligosaccharide antigen |

---

## Supplemental Table 2

T-cell density in the red nucleus (cells/mm<sup>2</sup>)

---

|                        | Controls      | PD            |
|------------------------|---------------|---------------|
| <b>CD8<sup>+</sup></b> | 0.245 ± 0.040 | 0.155 ± 0.090 |
| <b>CD4<sup>+</sup></b> | 0.021 ± 0.014 | 0.009 ± 0.005 |

---

CD8<sup>+</sup> and CD4<sup>+</sup> T-cell density in controls and PD patients do not differ ( $P = 0.34$  and  $P = 0.71$ , respectively; Student's  $t$  test). Data represent means ± SEM

## Supplemental Figure 1

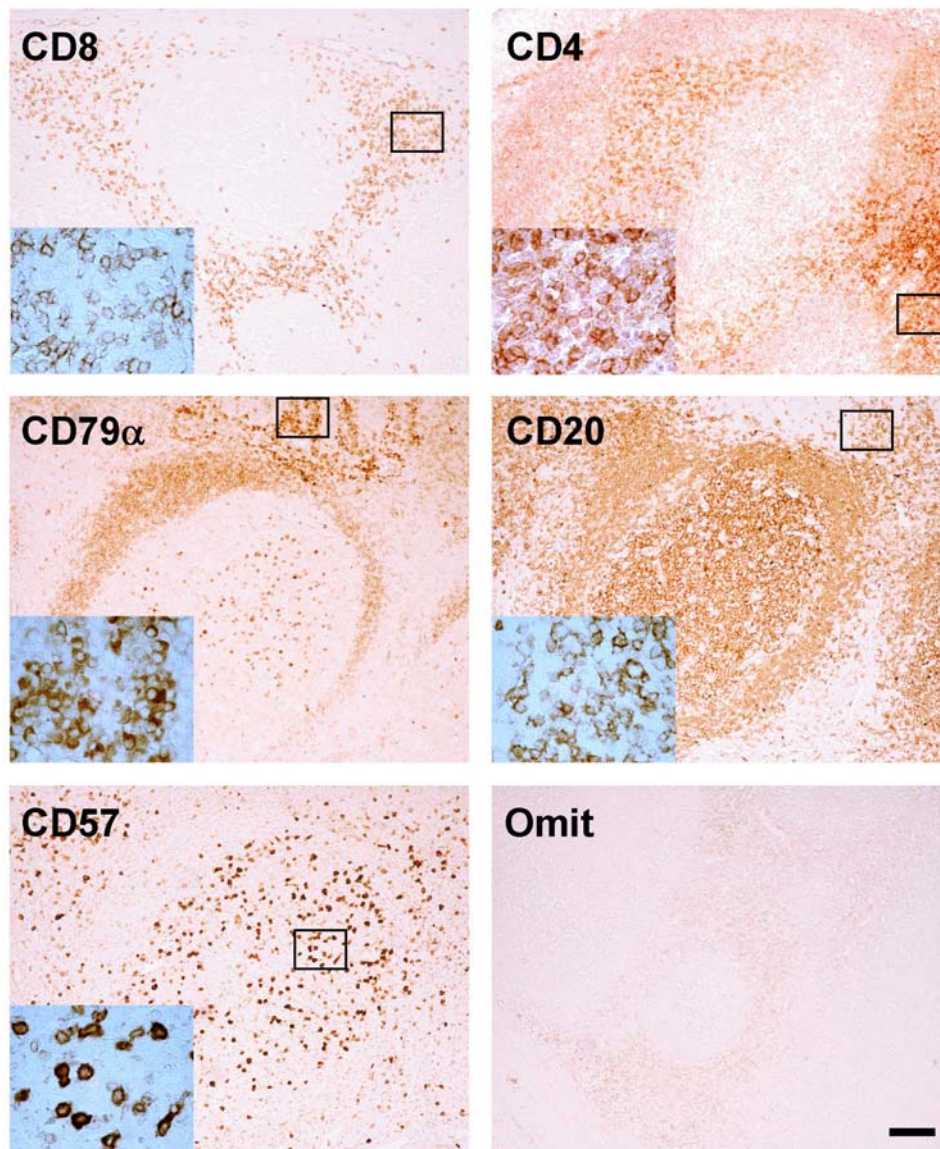

**Supplemental Figure 1:** Immunohistochemical detection of leukocyte subsets in human tonsil control tissue. Representative photomicrographs of human tonsil tissue sections immunostained for either CD8, CD4, CD79a, CD20 or CD57. Inset: higher magnification view of the boxed areas. A positive cellular staining was obtained for each of these leukocyte markers attesting the validity of the methodology used for the detection of lymphocyte subsets in our *postmortem* human brain material. Note that omission of the primary antibody resulted in absence of staining (Omit). Scale bar: 100  $\mu$ m (insets: 30  $\mu$ m).

## Supplemental Figure 2

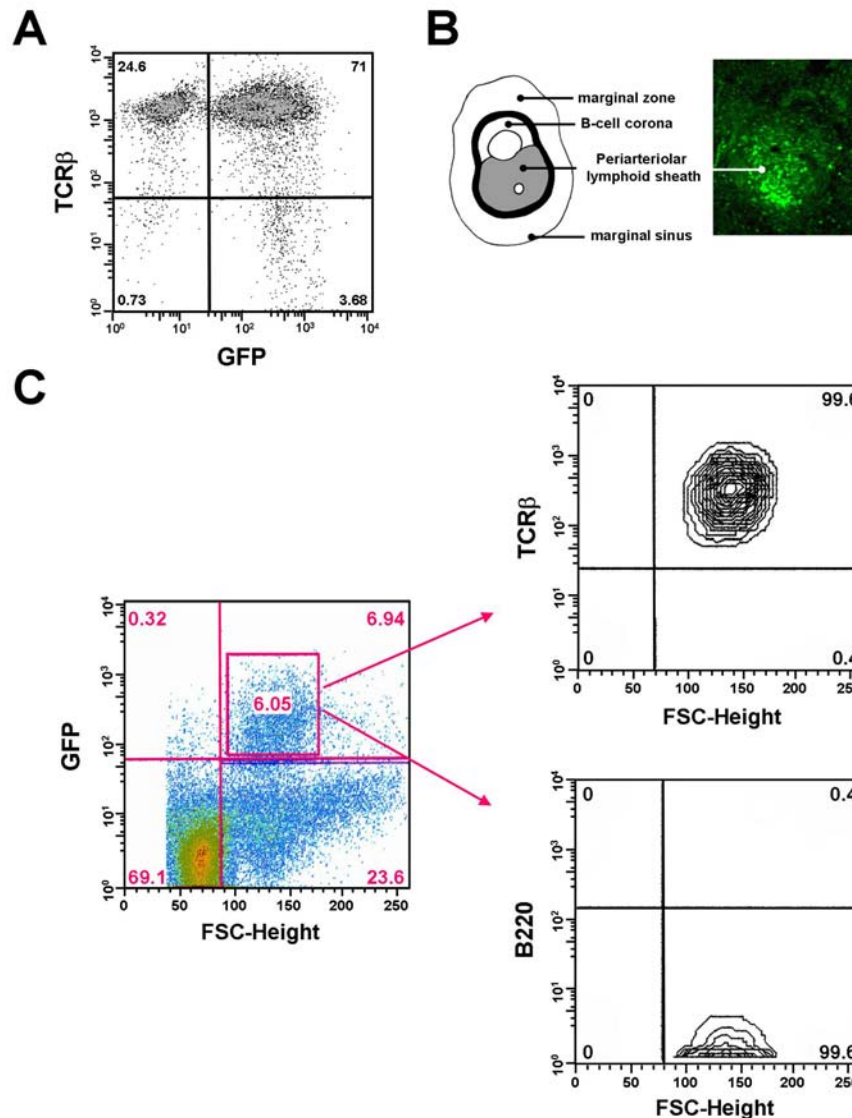

**Supplemental Figure 2:** Characterization of GFP+ T-cell-reconstituted *Rag1*<sup>-/-</sup> mice (a) Flow cytometry analysis of TCR $\beta$  and GFP expression in positively selected cells from Tie2-Cre+/ZEG+ mouse lymph nodes shows more than 95% enrichment in T-cells. (b) Schematic view of white pulp in a transverse section of mouse spleen (left). Note that the periaarteriolar lymphoid sheath (PALS) is made up of T cells. (Right) GFP+ cells in a transverse section of spleen from a GFP+ T-cell-reconstituted *Rag1*<sup>-/-</sup> mouse at 4 weeks post-transfer. Most of the GFP+ cells are located within the PALS. (c) Representative frequency of T- (TCR $\beta$ +) and B-cells (B220+) among gated GFP+ cell subsets in lymph nodes from a MPTP-treated GFP+ T-cell-reconstituted *Rag1*<sup>-/-</sup> mouse. GFP+ cells are almost exclusively of T-cell subtype without major B-cell contamination.

## Supplemental Figure 3

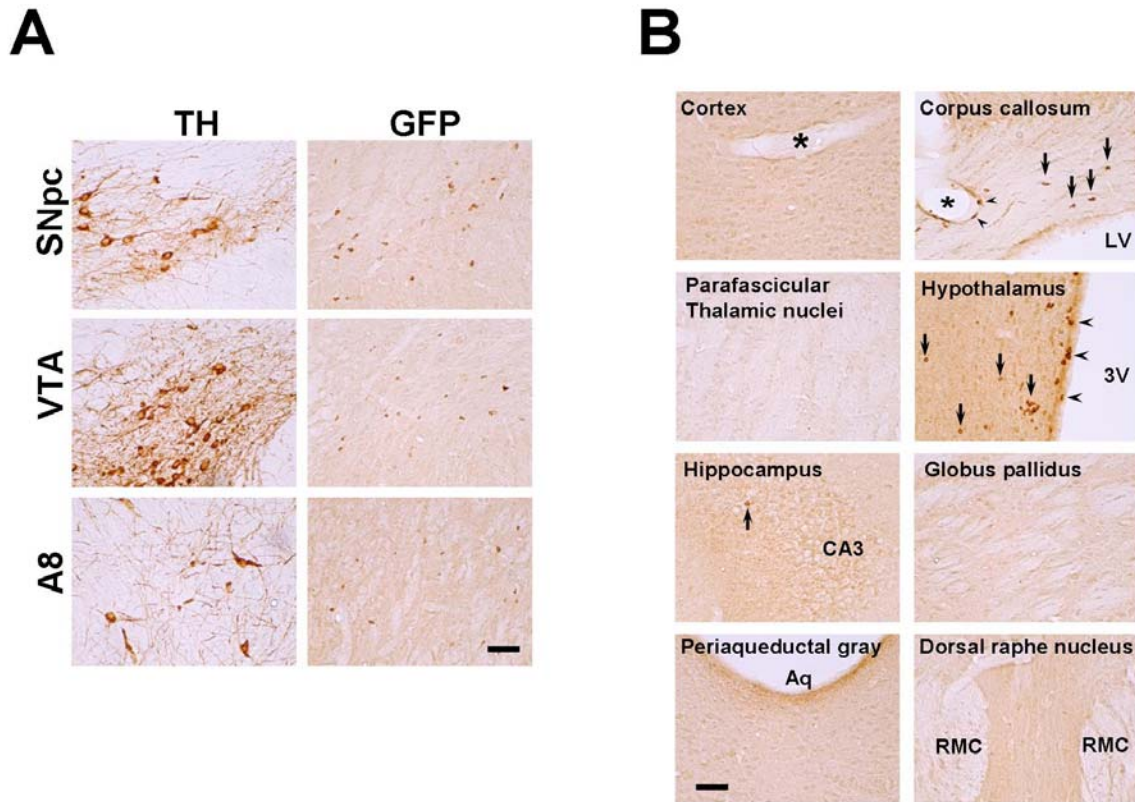

**Supplemental Figure 3:** Site specific recruitment of GFP+ T-cells in the brain of MPTP-intoxicated mice. **(a)** GFP+ T-cell infiltration (sections immunostained for GFP, right panels) in DN-containing brain areas (sections immunostained for TH, left panels) including the SNpc, the catecholaminergic cell group A8 and the ventral tegmental area (VTA). Scale bar: 80  $\mu$ m. **(b)** MPTP-induced T-cell extravasation in various brain areas. Except in the corpus callosum and hypothalamus, infiltrated GFP+ T-cells (arrows) are rarely found in other brain structures. Asterisk: blood vessels, LV, lateral ventricle, 3V, third ventricle, Aq, Sylvius aqueduct, RMC, magnocellular part of the red nucleus. Scale bar: 80  $\mu$ m.



## Supplemental Figure 4

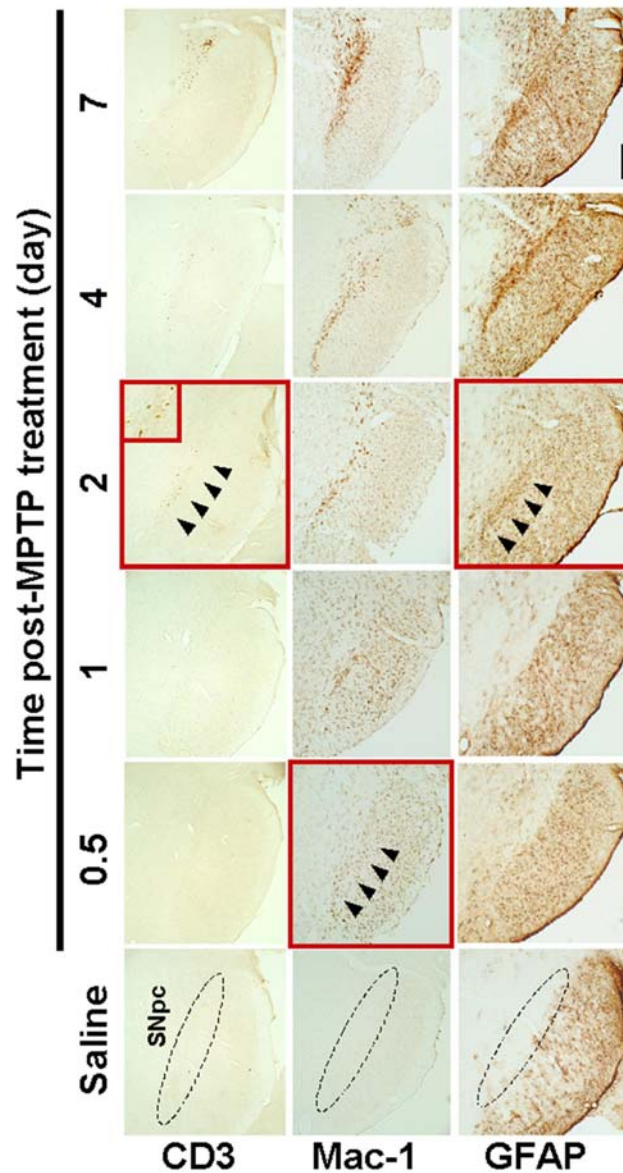

**Supplemental Figure 4:** Kinetics of T-cell brain infiltration and glial cell activation in the SNpc of MPTP-intoxicated mice. Representative photomicrographs of mesencephalic sections immunostained for CD3 (upper panels), Mac-1/CD11b (middle panels) and GFAP (lower panels) from saline- or MPTP-treated mice sacrificed at 12hr, 1, 2, 4 and 7 days after toxin exposure. The SNpc is delineated by dashed line. Red-circled photomicrographs indicate the earliest time point at which CD3+ T-cells, Mac-1+ activated microglial cells or GFAP+ astrocytes can be substantially detected in the SNpc (arrowheads). Inset in day 2 CD3 picture shows CD3+ T-cells at higher magnification. Note that microglial cell activation following MPTP-induced nigrostriatal pathway injury precedes T-cell infiltration and astrogliosis. Scale bar: 300  $\mu$ m.

## Supplemental Figure 5

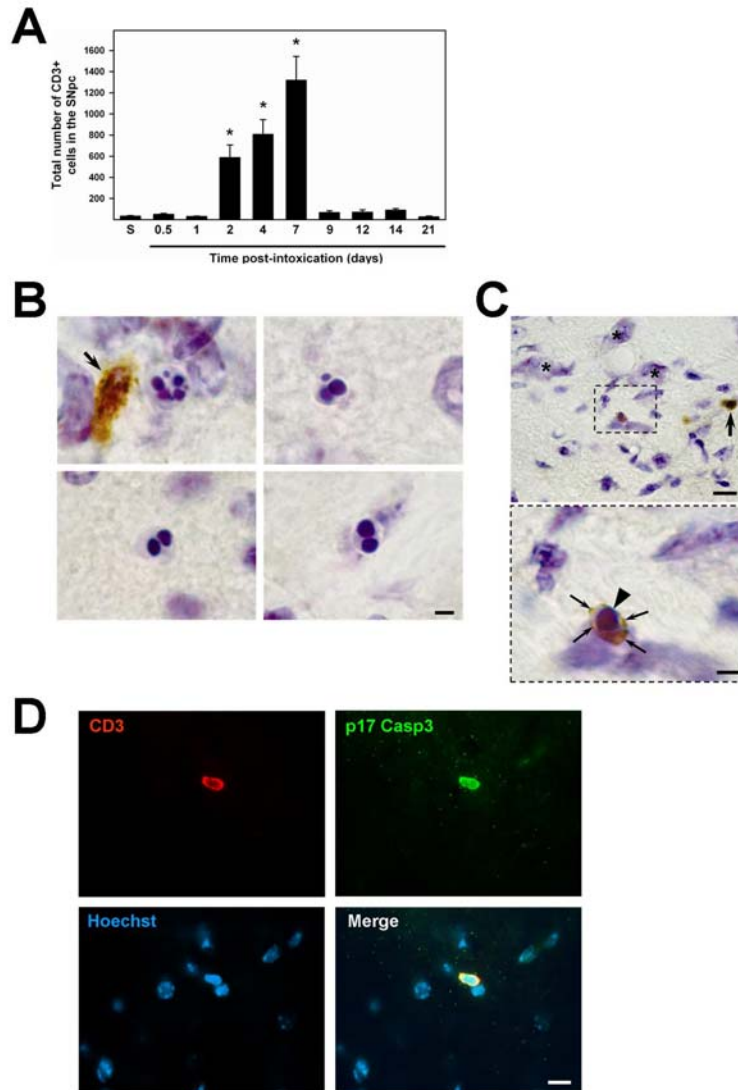

**Supplemental Figure 5:** Evidences for CD3+ T-cell apoptosis in the SNpc following MPTP intoxication. **(a)** Quantification of the total number of CD3+ T-cells in the SNpc at different time points after MPTP exposure. S: saline-treated controls. Each data point represents the mean  $\pm$  SEM of 5-13 brains per group. \*,  $P < 0.01$ , compared with saline-treated controls (Tukey *post hoc* analysis). **(b)** CD3 immunostaining with thionin counterstaining on mesencephalic sections from MPTP-treated mice sacrificed at day 7 and day 9 after intoxication. Photomicrographs at the level of the SNpc showing cases of pyknotic cells with well-defined thionin-stained chromatin clumps. A CD3+ T cell (arrow) with well preserved thionin-stained nucleus is shown in the vicinity of an apoptotic cell. Scale bar: 4  $\mu$ m **(c)** Same experimental conditions as in (b). Illustration of a CD3+ apoptotic cell within the SNpc at day 7 after MPTP. Arrow: normal CD3+ T cell, Asterisks: neurons. Magnification of the dashed box area shows a T cell with CD3 staining (arrows) and a condensed thionin-stained nucleus typical of apoptosis. Scale bar: 10  $\mu$ m, dashed box: 4  $\mu$ m. **(d)** Double immunofluorescent staining for CD3 (red) and p17 caspase-3 (green) with Hoechst counterstaining (blue). Scale bar: 8  $\mu$ m.

## Supplemental Figure 6

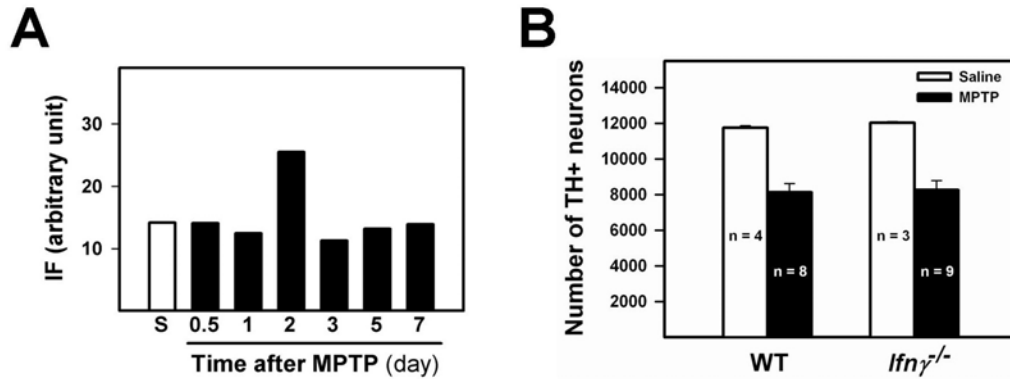

**Supplemental Figure 6:** Expression and role of IFN- $\gamma$  in MPTP-induced nigrostriatal pathway injury. **(a)** Time course of IFN- $\gamma$  expression in the ventral midbrain following MPTP intoxication as determined using antibody array glass chip (see Methods for details). IF: intensity of fluorescence, S: saline-treated mice. Note the up-regulated expression of IFN- $\gamma$  two days after MPTP exposure. **(b)** Quantification of total TH+ DN neurons in the SNpc at day 7 after MPTP (4x18mg/kg) or saline treatment in WT and *Ifnγ*<sup>-/-</sup> mice. Data represent the mean number of total nigral TH+ DNs  $\pm$  SEM for the indicated number of animals. Mice deficient in IFN- $\gamma$  and their WT littermates are equally sensitive to MPTP-induced dopaminergic cell death ( $P = 0.85$ , Student's  $t$  test).
